# Supplementary material
Source: PubMed Central journal article supplement (PMC518824)
Supplement: pnas_101_38_13726__3.pdf [file pnas_101_38_13726__3.pdf]

|        |                                                      |     |
|--------|------------------------------------------------------|-----|
| NfdA   | MTQ-----M-----RD                                     | 6   |
| LAF3-1 | MTGWYEFVPMIGFVSAAVFLLSVAYLPLLNDLYWSTLKSPTPPAGIVAD    | 50  |
| AepA   | MNH-----KGTIYM-----TSATHAD                           | 16  |
|        |                                                      |     |
| NfdA   | LMIINANVRTVDARNSCAQAVLVSGGRIAVGTETEVRCAAAPDAEVLDV    | 56  |
| LAF3-1 | LLVTNGTIFTSDSSLPFADSMATRNGRILKVGSFATLKCFIGDGLMEVNL   | 100 |
| AepA   | LILTNGRIYTVDTARPWAQAVAISSGRILAVGSTAEIEAYRTGETEVVDL   | 66  |
|        |                                                      |     |
|        | ↓ ↓                                                  |     |
| NfdA   | SGKTVVPGFIDAHHLSVAAFAPDSVDCSTPEPLATLDEVLEVIERHCRNI   | 106 |
| LAF3-1 | EGKIVVPGGLIDSHVHLISGGLOMAQVG--LRGVSQKDEFCKMKDAVQNA   | 148 |
| AepA   | GGRMAMPGFVDVHNHIMGG-QADLFETQLPAGASVDDICAHVRRQAEAA    | 115 |
|        |                                                      |     |
| NfdA   | PPGOWVRGINFHASHIREQRNPTRYE-LDEVAPNPFLLIDASCHAGFAN    | 155 |
| LAF3-1 | KEGSWILGGGWNNDFWGGELPSASW--IDEISPRNPVLLIRMDGFMALAN   | 196 |
| AepA   | VPGOWIIANOWGADMITALNSEASLAKLDAASLGHPVLLRDETMRNRVVN   | 165 |
|        |                                                      |     |
| NfdA   | SAALDLVGI GAHTPEPWGGEIERD-LSCKPTGILL EAAANLLHSASW-ND | 203 |
| LAF3-1 | SLALKIAGVILSTEDPVGGTIMRMP-SGEPTGLLIDAAMELV--TPWVKE   | 243 |
| AepA   | SVALQMCGIANDQDPDPAGSFGDRDPATGRLTGLLVE SAAGIVERVAA-DH | 214 |
|        |                                                      |     |
| NfdA   | YAEERDWDRAVELLHSKMNDYLAVGLTGVGDAMVTA-----KS-AEIVRR   | 246 |
| LAF3-1 | ISVDERREALFRASKYALTRGVTVIDLGRYFPGTTDELSWDFQDVVLY     | 293 |
| AepA   | FTEAMGEAAIARAVEIVNSYGVTAFOAASVLEIM-----KALTEI---     | 255 |
|        |                                                      |     |
| NfdA   | ADAAGKM-PFTLQQLHGGDHFFSMQDLGRSDTVDRIMEPESYL---LRGG   | 292 |
| LAF3-1 | ADSSKMMIRI---CL-----FFPITTSR--LLDLKLOKGSVISEWLYLG    | 334 |
| AepA   | -CNKGLTAWAVTSLPIEPSF-MFGLSGDELLALRDEYRTRH---VRPN     | 300 |
|        |                                                      |     |
| NfdA   | AMKIFVDRAYPSPAIDQIHGDC-----KTHVGFANFYKSEVHDLAVRA     | 335 |
| LAF3-1 | GVKAFIDGSL-GSNSALFYEEYIDT---PNNY-CLEVMDPEKISNFTMAA   | 379 |
| AepA   | FTKIFLD-GVPGARTSAFHDAYLDDGVHPRGYRGETLVTPDILVQHIDKS   | 349 |
|        |                                                      |     |
|        | ↓                                                    |     |
| NfdA   | SKLGINLAIHGMGNCAIDIVLDAYEAVRROSNADEVLR-LEHAFIAETGQ   | 384 |
| LAF3-1 | DKSGLOVAIHAI GDKANDMILDMYESVAAAANGDRRRFRIEHAQHLPQS   | 429 |
| AepA   | EKLGMLKIHCTGDYAVTEMLDAVEAVRHFNGPAKVMHHTAHASVVRPQD    | 399 |
|        |                                                      |     |
| NfdA   | GORMADL GIDL VANPGLAFGW-GEVENMWRGE---NOEHLK-LFPVRSML | 429 |
| LAF3-1 | ANRFGQLHIVASVQPDHLLDDADSV-----AKKLCSERAVKESYLFQSLL   | 474 |
| AepA   | VERFAKLSVVALDLSPI---WYPTTFLEGHKEAMCERATR-FWPIADLH    | 445 |
|        |                                                      |     |
|        | ↓                                                    |     |
| NfdA   | DAGVRVSLASDHPCGTYSPAEIMWTAV-----ARETMACAPLEPDEA      | 471 |
| LAF3-1 | NGNALLALGSDWPVADINPLHSIRTAVKRI PPKWDH-----AWIPSER    | 517 |
| AepA   | KSGALLAGGSDWPV---IPVPDPWTGIEGMVTRQNPSPGAFPCVALWPEQA  | 492 |
|        |                                                      |     |
| NfdA   | VTADEALRMYTINPAHASGRGSEEGSIEAGKRANLLVLD RDPVDCATGEL  | 521 |
| LAF3-1 | ISFTDALIAQTISAARAFLDHHLGSLSPGKLADFVILSTNSWDEF SKDV   | 567 |
| AepA   | IDLATAIRIFTLNSAIAMGIGAETGSIIEPGKSADIVLLDQQVFDVAPDRI  | 542 |
|        |                                                      |     |
| NfdA   | RELQVLRITYVDGVLRYERTGS                               | 542 |
| LAF3-1 | SA-SVLATYVGGKQLY----P                                | 583 |
| AepA   | ADTKVLTTFYFAGRAVYRR---                               | 560 |
