# Supplementary material
Source: PubMed Central journal article supplement (PMC518824)
Supplement: pnas_101_38_13726__4.pdf [file pnas_101_38_13726__4.pdf]

NfdA ( 52)VLDVSGKTVVPGFIDAHNHL(263)KLGINLAIHGMGNCAID(14)ADTVLRLEHAFIAETGQ(47)GVRVSLASDHPCGTYS(94)

|            |                      |                   |                   |                   |
|------------|----------------------|-------------------|-------------------|-------------------|
| PSIPRED    | EEE----EE-----HHH    | H----EEEE--HHHH   | ----EEEE-----HHH  | --EEEE-----H      |
| Confidence | 89778887707601034234 | 65993899623606799 | 78634875001268889 | 99099834788887567 |
| PROF_sec   | EEEE--EE--EE-----H   | H----EEEE--HHHH   | ----EEEE-----HHH  | --EEEE-----H      |
| Rel_sec    | 67325742202112133233 | 44870688514531134 | 76504431111368247 | 86466503565566661 |

LAF3-1 ( 96)EVNLEKIVVPLIDSHVHL(264)KSLQVAIHAIGDKAND(15)RDRRFRIEHAQHLAPGS(47)NALLALGSDWPVADINP(90)

|            |                      |                   |                   |                   |
|------------|----------------------|-------------------|-------------------|-------------------|
| PSIPRED    | EEE----EE-----HHH    | H---EEEE--HHHH    | ----EEEE-----HHH  | --EEEE-----H      |
| Confidence | 89778877817601020024 | 65991899742627899 | 67852787200279889 | 99099835788776427 |
| PROF_sec   | EEE----EE--EE-----H  | H---EEEE--HHHH    | ----EEEE-----HHH  | --EEEE-----H      |
| Rel_sec    | 56225723303211232011 | 44880688613504578 | 46631342102268357 | 73233135466456453 |

AepA ( 62)VVDLGRMAMPGFVDVHNHI(268)KLGMLKIHCTGDYAVT(15)AKVMHHIAHASVVRPQD(48)GALLAGGSDWPVIVPVD(95)

|            |                      |                   |                   |                   |
|------------|----------------------|-------------------|-------------------|-------------------|
| PSIPRED    | EEE----EE-----HHH    | H----EEEE--HHHH   | ----EEEE-----HHH  | --EEEE-----H      |
| Confidence | 88768887817712034344 | 66991899861768999 | 56641675110179889 | 98399706645445422 |
| PROF_sec   | EEE----EE--EE-----H  | H---EEEE--HHHH    | ----EEEE-----HHH  | --EEEE-----H      |
| Rel_sec    | 56325741113112132222 | 44980678605630046 | 65402331123468568 | 86466303555465645 |

CodA ( 45)SLDAEQGLVIPPVFEPIHL(140)KYDRLIDVHCDEIDDEQ(14)MGARVTASHTTAMHSYN(49)GINVCFGHDDVDFPWYP(104)  
PyrC ( 0)MTAPSQVLKIRRPDDWHLHL(110)KIGMPLLVHGEVTHADI(20)TALKVVFEHITTKDAAD(55)FNRVFLGTSAPARHR(88)  
UreC (117)VIAAEGKIVTAGGIDTHIH( 99)EMDIQVALHSDTLNESG( 8)GGRTIHTFHTEGAGGGH(70)GAFSLTSSDSQAMGRVG(198)

< beta1 >

<beta5>

<beta6>

<beta8>
