# Supplementary material
Source: PubMed Central journal article supplement (PMC518824)

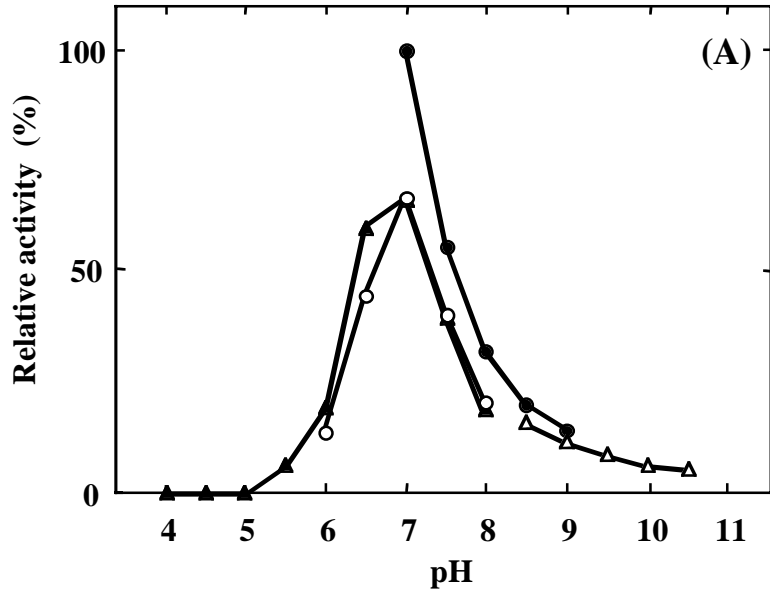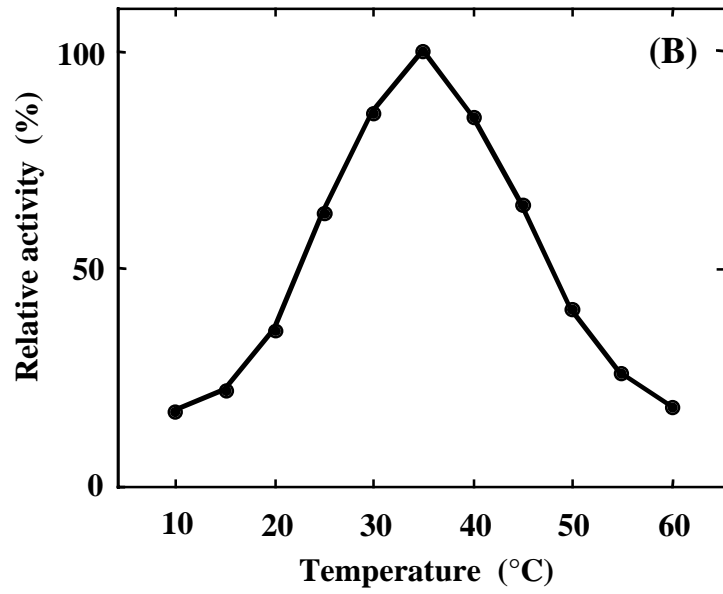

Supplement: pnas_101_38_13726__2.pdf [file pnas_101_38_13726__2.pdf]
